# Supplementary material for: How DNA affects the hyperthermophilic protein Ape10b2 for oligomerization: an investigation using multiple short molecular dynamics simulations
Source: Royal Society of Chemistry journal article supplement (doi:10.1039/d1cp04341b), 2021-01-01
Supplement: d1cp04341b1.pdf [file d1cp04341b1.pdf]

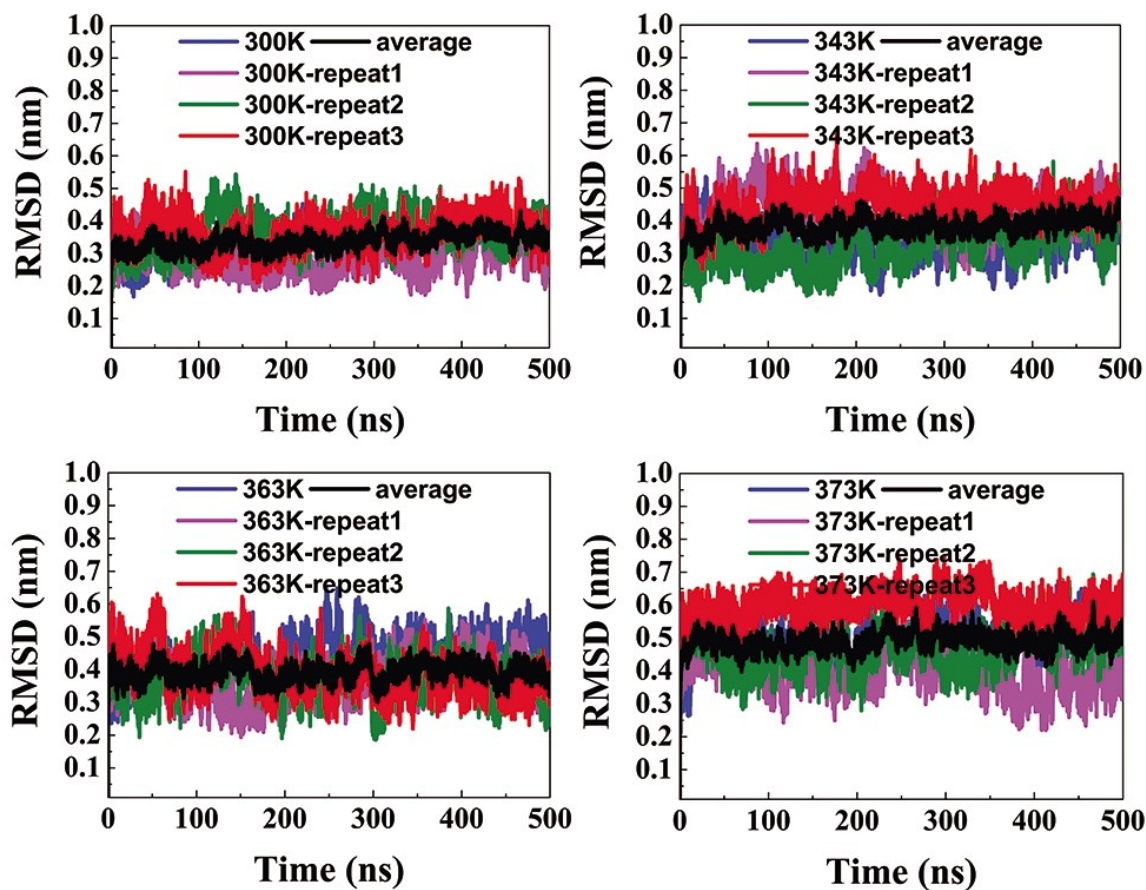

Fig. S1. Root-mean-square deviation (RMSD) as a function of time for Ape10b2-dsDNA complex.

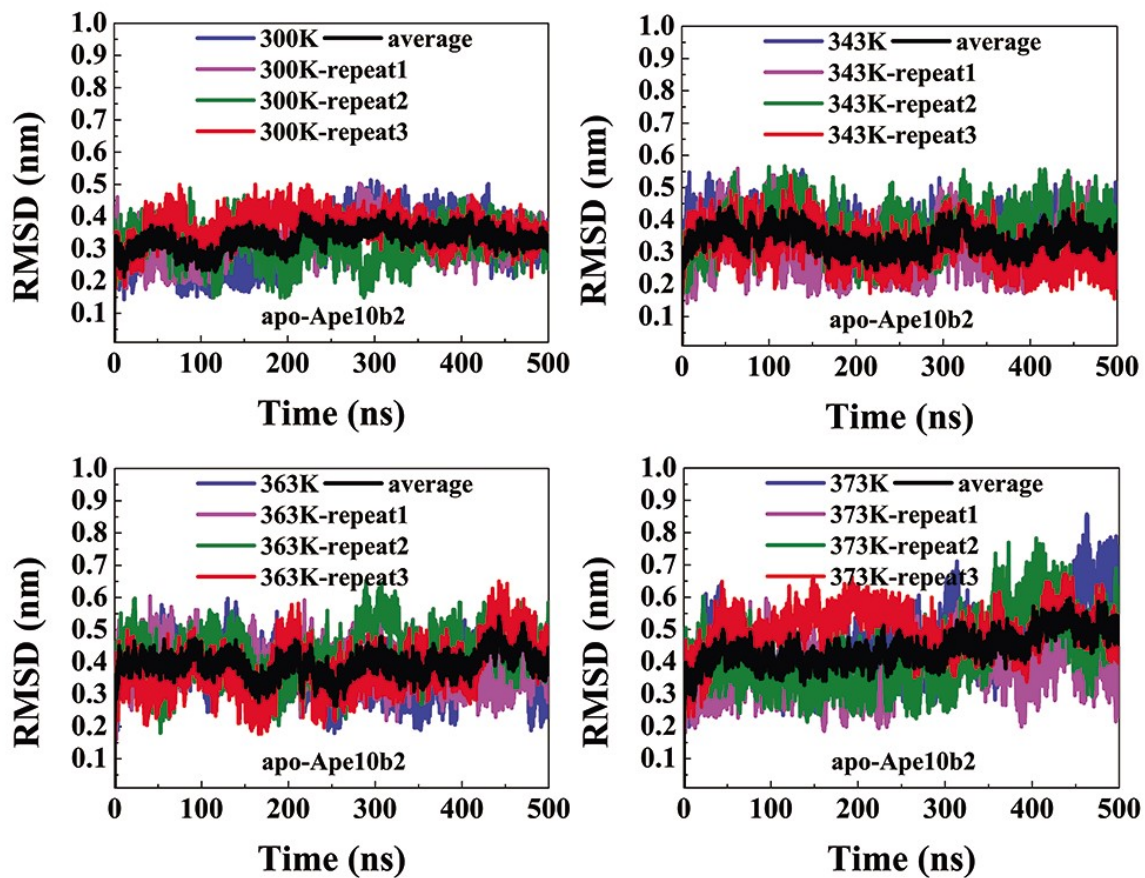

Fig. S2. Root-mean-square deviation (RMSD) as a function of time for apo-Ape10b2.

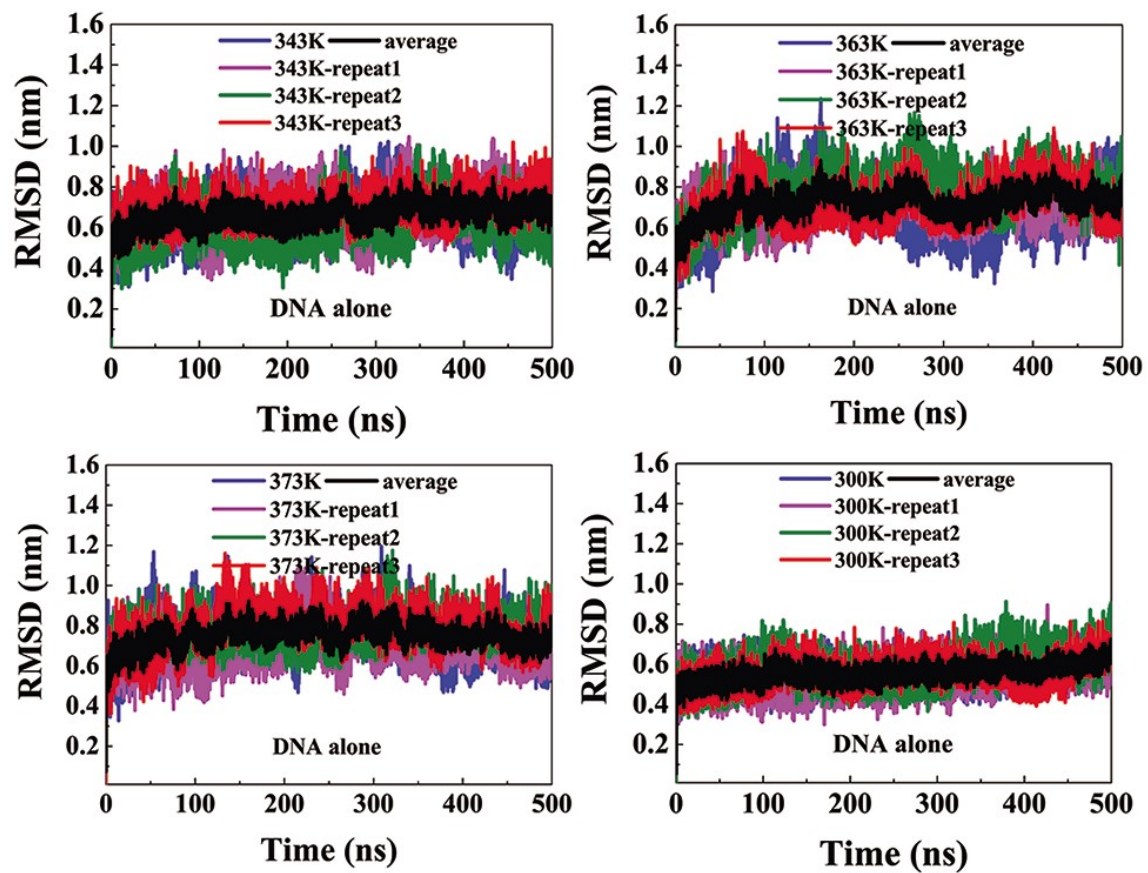

Fig. S3. Root-mean-square deviation (RMSD) as a function of time for alone dsDNA.

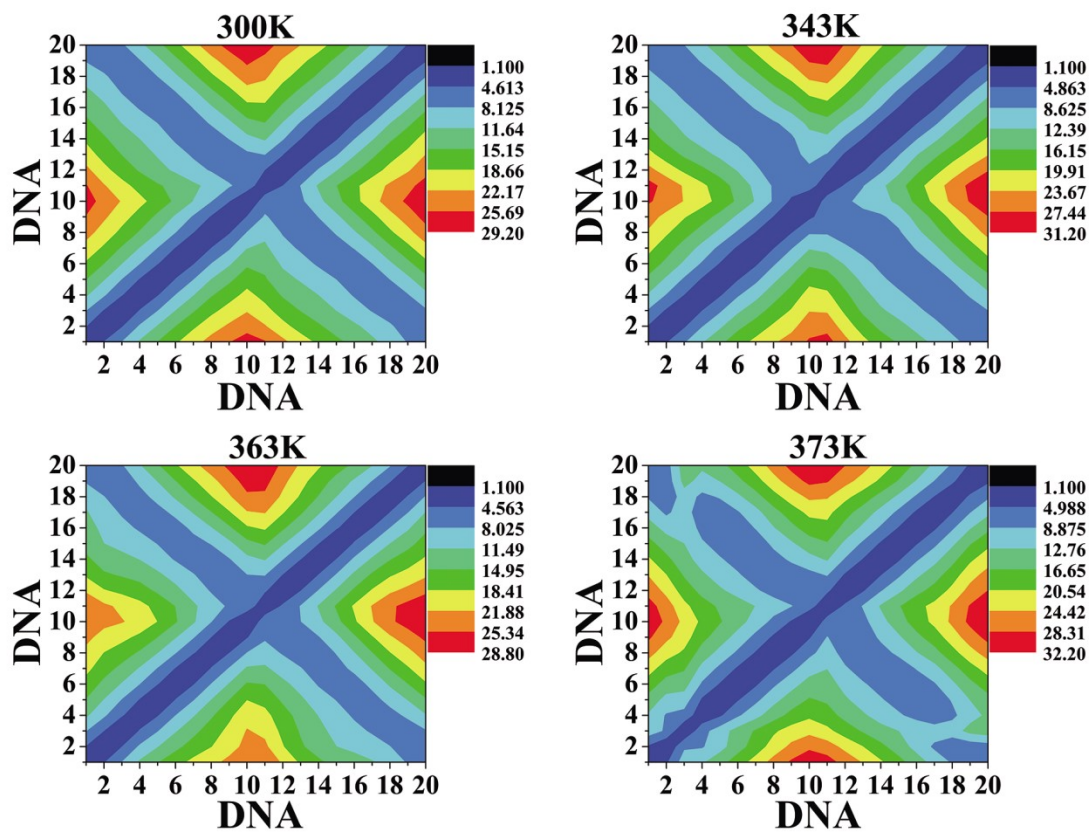

**Fig. S4** Contact maps were calculated and plotted over the simulations on DNA in complex at four different temperatures (300, 343, 363, and 373 K).

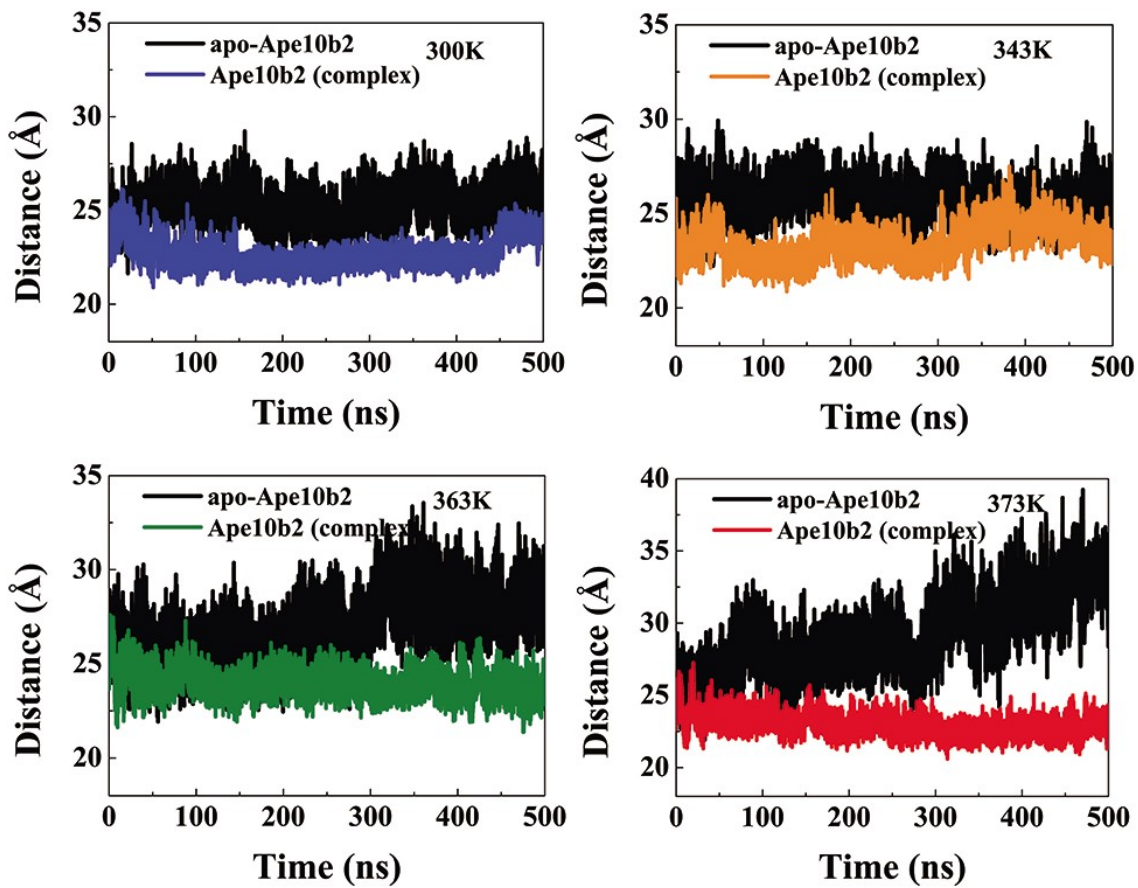

Fig. S5. Distance evolution values of loop1 (residues 10 to 16) region in apo-Ape10b2 (black) and Ape10b2 in complex at 300 K (blue), 343 K (orange), 363 K (olive), and 373 K (red).

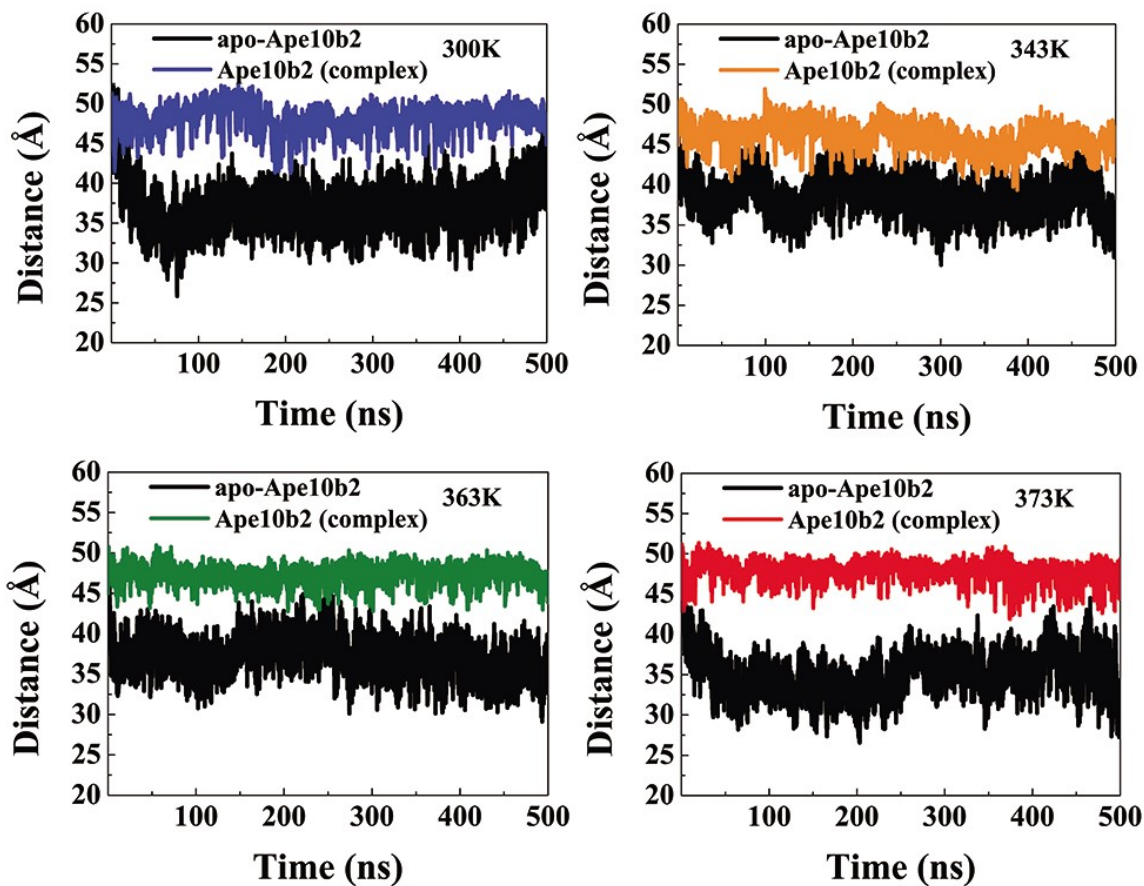

**Fig. S6.** Distance evolution values of loop5 (residues 75 to 86) region in apo-Ape10b2 (black) and Ape10b2 in complex at 300 K (blue), 343 K (orange), 363 K (olive), and 373 K (red).

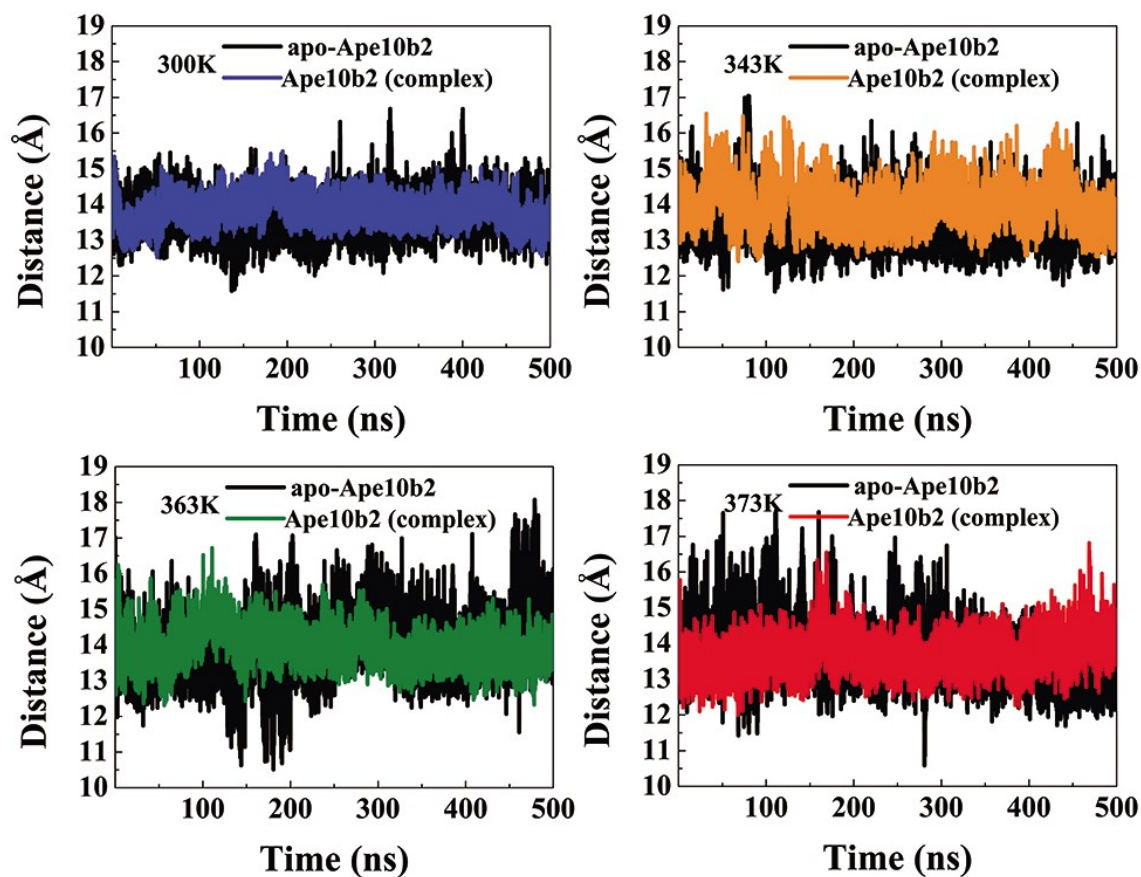

**Fig. S7.** Distance evolution values of residues 40-43 in apo-Ape10b2 (black) and Ape10b2 in complex at 300 K (blue) , 343 K (orange), 363 K (olive), and 373 K (red).

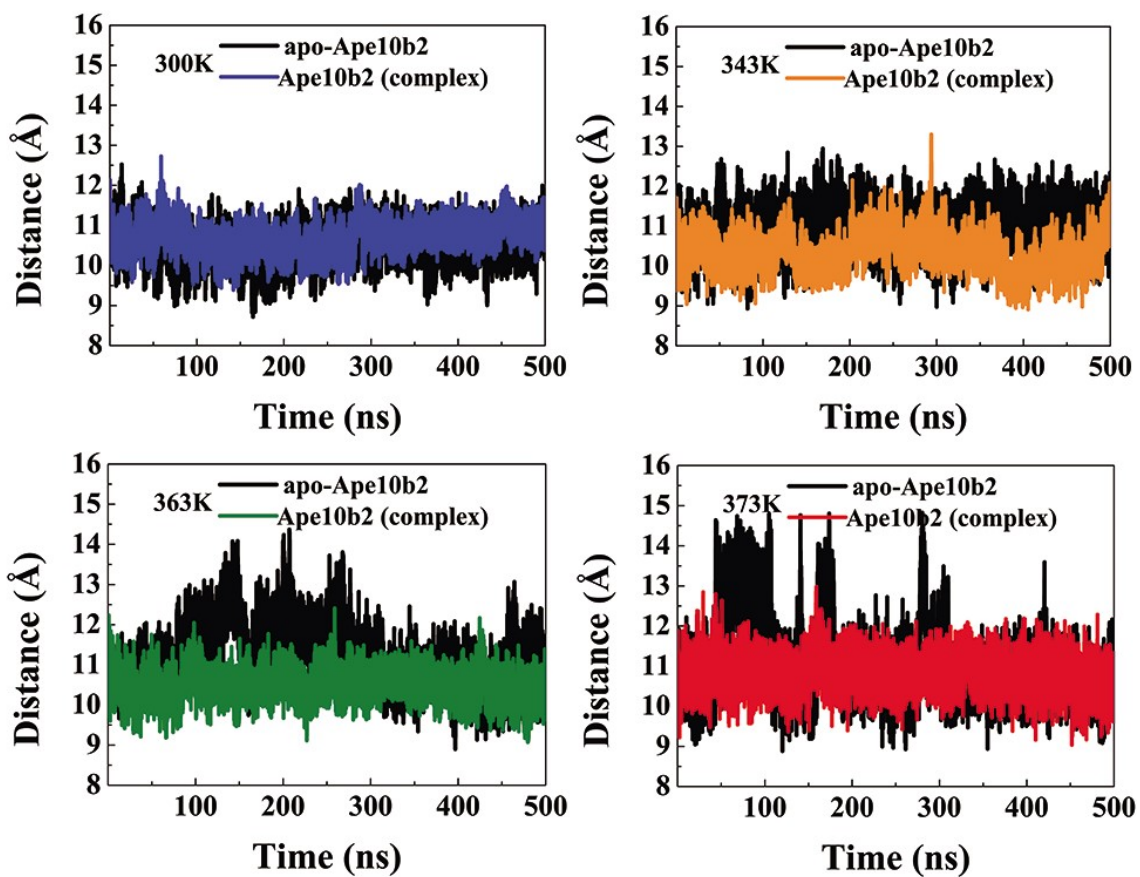

**Fig. S8.** Distance evolution values of residues 45-46 in apo-Ape10b2 (black) and Ape10b2 in complex at 300 K (blue), 343 K (orange), 363 K (olive), and 373 K (red).



**Table S1**

Relative binding free energies (kcal/mol) contributed by important residues ( $|\Delta G_{\text{bind}}| \geq 1.0$  kcal/mol) in Ape10b2-dsDNA complex at 300 K.

| Residue  | ELE      | GB      | VDW    | SA     | Total  |
|----------|----------|---------|--------|--------|--------|
| Arg13(A) | -299.836 | 297.238 | -1.010 | -0.375 | -3.982 |
| Lys14(A) | -220.710 | 219.980 | -0.452 | -0.014 | -1.196 |
| Pro15(A) | -11.723  | 9.953   | -1.814 | -0.322 | -3.905 |
| Val16(A) | -11.376  | 9.108   | -0.861 | -0.148 | -3.278 |
| Arg40(A) | -251.676 | 248.554 | -0.550 | -0.245 | -3.917 |
| Gly41(A) | -9.649   | 7.395   | -0.568 | -0.123 | -2.945 |
| Arg42(A) | -341.987 | 340.574 | -4.556 | -0.765 | -6.734 |
| Arg46(A) | -316.925 | 310.427 | -0.651 | -0.222 | -7.371 |
| Lys56(A) | -265.544 | 264.209 | -1.144 | -0.305 | -2.783 |
| Arg57(A) | -249.861 | 247.932 | -1.415 | -0.347 | -3.690 |
| Val76(A) | -7.304   | 6.233   | -2.995 | -0.271 | -4.337 |
| Gln77(A) | -1.299   | 1.175   | -2.849 | -0.533 | -3.506 |
| Thr78(A) | -3.882   | 4.396   | -2.627 | -0.232 | -2.344 |
| Pro79(A) | -3.289   | 3.651   | -1.935 | -0.324 | -1.897 |
| Thr85(A) | -2.783   | 3.995   | 1.382  | -0.238 | -0.407 |
| Arg86(A) | -306.290 | 305.743 | -5.439 | -0.993 | -6.979 |
| Arg13(C) | -323.890 | 317.809 | -1.778 | -0.402 | -8.261 |
| Arg40(C) | -285.419 | 280.829 | -0.471 | -0.284 | -5.346 |
| Arg42(C) | -340.517 | 338.177 | -2.017 | -0.529 | -4.885 |
| Asn45(C) | -13.329  | 10.579  | -0.656 | -0.143 | -3.548 |
| Arg46(C) | -299.964 | 295.518 | -0.291 | -0.233 | -4.971 |
| Ile74(C) | -2.210   | 2.197   | -0.965 | -0.119 | -1.098 |
| Val76(C) | -6.406   | 6.610   | -2.221 | -0.290 | -2.308 |
| Gln77(C) | -0.119   | 1.281   | -3.217 | -0.534 | -2.588 |
| Thr78(C) | -4.023   | 4.690   | -2.315 | -0.147 | -1.794 |
| Pro79(C) | -4.995   | 5.743   | -4.052 | -0.693 | -3.997 |
| Arg84(C) | -184.651 | 184.548 | -0.874 | -0.132 | -1.109 |
| Arg86(C) | -298.816 | 299.443 | -4.419 | -0.871 | -4.664 |
| Val88(C) | -7.365   | 6.931   | -0.924 | -0.101 | -1.458 |
| 1G4      | -159.281 | 161.038 | -1.690 | -0.419 | -0.352 |
| 1C6      | -185.193 | 186.645 | -3.497 | -0.847 | -2.891 |
| 1G15     | -104.244 | 106.706 | -2.839 | -0.434 | -0.811 |
| 2G4      | -159.281 | 161.038 | -1.690 | -0.419 | -0.352 |
| 2C6      | -185.193 | 186.645 | -3.497 | -0.847 | -2.891 |
| 2C15     | -104.244 | 106.706 | -2.839 | -0.434 | -0.811 |

**Table S2**

Relative binding free energies (kcal/mol) contributed by important residues ( $|\Delta G_{\text{bind}}| \geq 1.0$  kcal/mol) in Ape10b2-dsDNA complex at 343 K.

| Residue  | ELE      | GB      | VDW    | SA     | Total   |
|----------|----------|---------|--------|--------|---------|
| Arg10(A) | -272.022 | 264.895 | -1.608 | -0.535 | -9.270  |
| Gly12(A) | -5.411   | 5.084   | -0.911 | -0.067 | -1.305  |
| Arg13(A) | -362.752 | 354.758 | -2.080 | -0.591 | -10.665 |
| Lys14(A) | -335.459 | 337.546 | -3.009 | -0.844 | -1.766  |
| Pro15(A) | -0.203   | 0.062   | -0.850 | -0.066 | -1.056  |
| Val16(A) | -4.174   | 3.961   | -0.829 | -0.181 | -1.223  |
| Arg40(A) | -289.703 | 284.797 | -1.148 | -0.413 | -6.466  |
| Arg42(A) | -357.531 | 352.905 | -4.303 | -0.745 | -9.674  |
| Arg46(A) | -341.608 | 334.045 | -0.750 | -0.349 | -8.662  |
| Arg86(A) | -293.761 | 289.493 | -0.607 | -0.359 | -5.234  |
| Arg10(C) | -261.406 | 253.977 | -0.972 | -0.392 | -8.792  |
| Arg13(C) | -311.959 | 314.264 | -6.818 | -1.279 | -5.792  |
| Lys14(C) | -228.486 | 228.035 | -0.685 | -0.099 | -1.235  |
| Arg40(C) | -275.275 | 268.205 | -2.795 | -0.331 | -10.196 |
| Arg42(C) | -338.557 | 339.356 | -7.069 | -1.380 | -7.650  |
| Asn43(C) | -1.477   | 1.565   | -1.522 | -0.168 | -1.603  |
| Asn45(C) | -20.281  | 17.624  | -0.451 | -0.102 | -3.209  |
| Asn46(C) | -305.610 | 298.230 | -0.039 | -0.326 | -7.745  |
| Arg84(C) | -245.245 | 243.101 | -0.230 | -0.140 | -2.515  |
| Arg86(C) | -318.106 | 308.440 | -1.418 | -0.476 | -11.560 |
| Val88(C) | -6.769   | 6.354   | -0.816 | -0.007 | -1.238  |
| 1G3      | -123.570 | 127.226 | -4.802 | -0.825 | -1.972  |
| 1G4      | -163.706 | 165.512 | -2.760 | -0.610 | -1.564  |
| 1C12     | -143.319 | 143.380 | -1.177 | -0.134 | -1.250  |
| 1C13     | -194.271 | 190.149 | -3.831 | -0.537 | -8.490  |
| 1G14     | -195.866 | 191.483 | -6.871 | -1.182 | -12.436 |
| 2C3      | -108.160 | 105.579 | -0.451 | -0.039 | -3.071  |
| 2G4      | -100.552 | 100.317 | -1.898 | -0.171 | -2.303  |
| 2G5      | -121.616 | 124.603 | -3.668 | -0.387 | -1.067  |
| 2C6      | -182.811 | 182.755 | -2.680 | -0.575 | -3.311  |
| 2G7      | -203.439 | 205.846 | -5.009 | -0.919 | -3.521  |
| 2T8      | -193.770 | 191.636 | -2.714 | -0.734 | -5.581  |
| 2G9      | -165.993 | 165.590 | -0.816 | -0.314 | -1.532  |
| 2G11     | -95.278  | 94.596  | -0.455 | -0.076 | -1.213  |
| 2G12     | -85.075  | 83.024  | -0.153 | -0.074 | -2.279  |

**Table S3**

Relative binding free energies (kcal/mol) contributed by important residues ( $|\Delta G_{\text{bind}}| \geq 1.0$  kcal/mol) in Ape10b2-dsDNA complex at 363 K.

| Residue  | ELE      | GB      | VDW    | SA     | Total   |
|----------|----------|---------|--------|--------|---------|
| Arg10(A) | -287.505 | 279.500 | -0.471 | -0.319 | -8.794  |
| Arg13(A) | -356.081 | 352.129 | -4.243 | -0.947 | -9.142  |
| Arg40(A) | -279.188 | 274.327 | -2.875 | -0.297 | -8.033  |
| Gly41(A) | -9.869   | 7.861   | -1.163 | -0.090 | -3.261  |
| Arg42(A) | -378.388 | 371.270 | -4.045 | -0.842 | -12.005 |
| Asn43(A) | -2.257   | 2.588   | -1.440 | -0.188 | -1.297  |
| Asn45(A) | -21.812  | 19.142  | -0.580 | -0.062 | -3.311  |
| Arg46(A) | -332.151 | 324.473 | -0.433 | -0.322 | -8.434  |
| Arg84(A) | -275.792 | 276.168 | -2.557 | -0.524 | -2.705  |
| Arg86(A) | -302.725 | 302.087 | -3.391 | -0.768 | -4.797  |
| Val88(A) | -6.756   | 6.577   | -2.344 | -0.419 | -2.942  |
| Arg13(C) | -321.675 | 316.984 | -3.757 | -0.812 | -9.261  |
| Arg40(C) | -255.055 | 249.423 | -1.038 | -0.412 | -7.082  |
| Gly41(C) | -7.749   | 6.792   | -0.562 | -0.040 | -1.558  |
| Arg42(C) | -327.495 | 323.657 | -4.458 | -0.840 | -9.135  |
| Arg46(C) | -327.701 | 318.588 | 0.155  | -0.176 | -9.134  |
| Val76(C) | 0.247    | 0.208   | -1.746 | -0.184 | -1.475  |
| Gln77(C) | 0.693    | -1.523  | -0.453 | -0.122 | -1.406  |
| Thr78(C) | -9.883   | 10.105  | -1.672 | -0.086 | -1.537  |
| Pro79(C) | -6.219   | 6.829   | -2.953 | -0.524 | -2.866  |
| Arg84(C) | -258.896 | 257.498 | -1.394 | -0.250 | -3.042  |
| Arg86(C) | -307.792 | 299.955 | -3.809 | -0.733 | -12.378 |
| 1G2      | -87.913  | 90.031  | -3.906 | -0.525 | -2.314  |
| 1G4      | -160.565 | 163.358 | -6.093 | -0.960 | -4.259  |
| 1C13     | -135.977 | 137.005 | -1.808 | -0.239 | -1.018  |
| 1G14     | -160.868 | 164.605 | -5.297 | -0.838 | -2.397  |
| 1G15     | -169.777 | 171.582 | -4.433 | -0.839 | -3.467  |
| 1G16     | -112.481 | 115.632 | -5.716 | -1.121 | -3.686  |
| 2C2      | -67.082  | 67.291  | -1.982 | -0.286 | -2.058  |
| 2G5      | -136.749 | 137.133 | -2.484 | -0.348 | -2.447  |
| 2C6      | -196.627 | 196.226 | -3.595 | -0.752 | -4.747  |
| 2G7      | -200.176 | 203.022 | -3.846 | -0.792 | -1.791  |
| 2T8      | -167.481 | 169.585 | -3.074 | -0.744 | -1.714  |
| 2G9      | -138.218 | 138.572 | -0.683 | -0.234 | -0.564  |
| 2C13     | -87.827  | 87.007  | -0.294 | -0.036 | -1.150  |
| 2C14     | -101.009 | 100.646 | -1.842 | -0.246 | -2.450  |

**Table S4**

Relative binding free energies (kcal/mol) contributed by important residues ( $|\Delta G_{\text{bind}}| \geq 1.0$  kcal/mol) in Ape10b2-dsDNA complex at 373 K.

| Residue  | ELE      | GB      | VDW    | SA     | Total   |
|----------|----------|---------|--------|--------|---------|
| Arg13(A) | -318.229 | 313.803 | -2.211 | -0.706 | -7.343  |
| Lys14(A) | -222.508 | 221.892 | -0.389 | -0.037 | -1.042  |
| Arg40(A) | -292.610 | 283.220 | -0.289 | -0.254 | -9.933  |
| Gly41(A) | -8.653   | 8.042   | -0.963 | -0.071 | -1.646  |
| Arg42(A) | -359.345 | 353.595 | -4.008 | -0.741 | -10.499 |
| Arg46(A) | -319.983 | 313.375 | -0.556 | -0.317 | -7.481  |
| Gln77(A) | -8.481   | 7.859   | -1.160 | -0.260 | -2.043  |
| Pro79(A) | 3.666    | -3.208  | -1.413 | -0.205 | -1.160  |
| Gln82(A) | -1.198   | 1.562   | -4.445 | -0.600 | -4.680  |
| Arg84(A) | -245.352 | 244.143 | -5.146 | -0.750 | -7.106  |
| Thr85(A) | 1.823    | 0.379   | -4.792 | -0.613 | -3.203  |
| Arg86(A) | -280.752 | 271.988 | -2.422 | -0.309 | -11.495 |
| Arg87(A) | -298.998 | 291.347 | -1.847 | -0.405 | -9.904  |
| Val88(A) | -9.072   | 6.425   | -3.445 | -0.425 | -6.517  |
| Arg10(C) | -234.432 | 230.588 | -3.098 | -0.592 | -7.533  |
| Ile11(C) | 2.233    | -1.281  | -1.510 | -0.049 | -0.607  |
| Gly12(C) | -5.382   | 3.222   | -1.551 | -0.143 | -3.853  |
| Arg13(C) | -328.609 | 321.704 | -4.023 | -0.797 | -11.726 |
| Lys14(C) | -267.498 | 266.706 | -0.751 | -0.041 | -1.583  |
| Pro15(C) | -7.092   | 7.052   | -1.949 | -0.384 | -2.372  |
| Ala39(C) | -9.550   | 7.367   | -0.916 | -0.038 | -3.137  |
| Arg40(C) | -259.454 | 254.879 | -3.133 | -0.617 | -8.326  |
| Gly41(C) | -5.260   | 4.231   | -0.521 | -0.042 | -1.592  |
| Arg42(C) | -363.362 | 353.125 | -4.315 | -0.934 | -15.487 |
| Asn43(C) | 1.945    | -3.570  | -1.766 | -0.203 | -3.594  |
| Asn45(C) | -8.450   | 5.869   | -0.957 | -0.079 | -3.617  |
| Arg46(C) | -334.746 | 327.185 | -0.954 | -0.084 | -8.598  |
| Arg57(C) | -251.717 | 250.637 | -0.583 | -0.089 | -1.752  |
| Ile74(C) | -2.681   | 2.666   | -2.182 | -0.254 | -2.451  |
| Val76(C) | -6.799   | 6.739   | -3.574 | -0.340 | -3.975  |
| Gln77(C) | 2.631    | -0.450  | -3.201 | -0.441 | -1.461  |
| Thr78(C) | -4.997   | 5.323   | -1.778 | -0.131 | -1.583  |
| Pro79(C) | -5.062   | 5.276   | -1.230 | -0.236 | -1.253  |
| Arg84(C) | -234.810 | 233.872 | -4.698 | -0.626 | -6.262  |
| Thr85(C) | -2.555   | 3.647   | -2.068 | -0.280 | -1.255  |
| Arg86(C) | -323.188 | 312.985 | -3.856 | -0.809 | -14.867 |

---

|          |          |         |         |        |        |
|----------|----------|---------|---------|--------|--------|
| Arg87(C) | -222.253 | 220.935 | -1.010  | -0.139 | -2.467 |
| 1G2      | -66.532  | 65.809  | -2.528  | -0.304 | -3.556 |
| 1G3      | -87.926  | 89.774  | -2.907  | -0.168 | -1.227 |
| 1G4      | -139.354 | 139.764 | -4.908  | -0.605 | -5.104 |
| 1C5      | -166.496 | 161.799 | -3.415  | -0.613 | -8.726 |
| 1C6      | -175.528 | 179.548 | -7.133  | -1.028 | -4.141 |
| 1G7      | -195.716 | 194.127 | -4.797  | -0.929 | -7.314 |
| 1G14     | -99.312  | 104.004 | -6.857  | -0.820 | -2.984 |
| 1G15     | -131.331 | 136.011 | -8.333  | -1.119 | -4.772 |
| 2C3      | -146.994 | 153.616 | -11.972 | -1.752 | -7.102 |
| 2G4      | -168.154 | 171.878 | -4.723  | -0.620 | -1.619 |
| 2G5      | -184.713 | 189.742 | -5.039  | -0.701 | -0.711 |
| 2C6      | -182.553 | 183.814 | -2.867  | -0.589 | -2.194 |
| 2G7      | -197.769 | 196.489 | -1.595  | -0.540 | -3.416 |
| 2T8      | -149.200 | 149.381 | -1.455  | -0.409 | -1.683 |
| 2G9      | -124.307 | 123.923 | -0.268  | -0.114 | -0.766 |

---

**Table S5**

Ape10b2 salt bridges with the DNA backbone (columns 1-3) and hydrogen bonds with the DNA bases (columns 4-6) with occupancy over 20% are highly dynamic at 300K.

| protein      | DNA backbone | Occupancy (%) | protein       | DNA base  | Occupancy (%) |
|--------------|--------------|---------------|---------------|-----------|---------------|
| Arg46(C)@NH2 | 1C6@O2P      | 96.50         | Asn45(C)(ND2) | 1C6(O1P)  | 96.80         |
| Arg13(C)@NH2 | 1G7@O1P      | 81.00         | Arg86(A)(NH1) | 2C14(O2)  | 78.50         |
| Arg46(A)@NE  | 2G7@O1P      | 43.80         | Arg86(C)(NH1) | 2C3(O2)   | 31.10         |
| Arg42(C)@NH2 | 2C6@O1P      | 30.70         | Thr85(A)(OG1) | 2C15(O3') | 24.90         |
| Arg40(A)@NH2 | 1G4@O2P      | 30.60         |               |           |               |
| Arg40(C)@NH2 | 2G5@O1P      | 28.50         |               |           |               |
| Arg57(A)@NH2 | 1G15@O2P     | 27.00         |               |           |               |
| Arg40(C)@NH1 | 2G4@O2P      | 26.50         |               |           |               |
| Arg42(C)@NE  | 2G5@O1P      | 25.10         |               |           |               |

**Table S6**

Ape10b2 salt bridges with the DNA backbone (columns 1-3) and hydrogen bonds with the DNA bases (columns 4-6) with occupancy over 20% are highly dynamic at 343K.

| protein      | DNA backbone | Occupancy (%) | protein      | DNA base | Occupancy (%) |
|--------------|--------------|---------------|--------------|----------|---------------|
| Arg86(C)@NH1 | 1G14@O1P     | 93.30         | Arg42(C)@NH2 | 1C13@O2  | 88.70         |
| Arg40(C)@NH2 | 1G14@O1P     | 92.40         | Arg13(C)@NH1 | 2G4@N3   | 62.10         |
| Arg42(A)@NH2 | 2G7@O1P      | 88.40         | Arg13(C)@NH2 | 2C3@O2   | 60.00         |
| Arg46(C)@NH2 | 2C6@O2P      | 87.90         | Asn45(C)@ND2 | 2G7@O2P  | 58.40         |
| Arg13(A)@NH2 | 2T8@O1P      | 78.60         | Arg42(C)@NH1 | 1C12@O2  | 20.60         |
| Arg10(C)@NH2 | 1G15@O1P     | 65.40         |              |          |               |
| Arg46(A)@NH2 | 2G9@O1P      | 50.90         |              |          |               |
| Arg46(A)@NH2 | 2T8@O2P      | 50.50         |              |          |               |
| Arg10(A)@NH2 | 1G3@O2P      | 42.40         |              |          |               |
| Arg84(C)@NH2 | 1C13@O1P     | 26.50         |              |          |               |
| Arg10(A)@NH2 | 1G4@O2P      | 22.80         |              |          |               |
| Arg86(A)@NH1 | 1C6@O2P      | 21.70         |              |          |               |
| Arg40(A)@NH2 | 1C5@O1P      | 20.80         |              |          |               |

**Table S7**

Ape10b2 salt bridges with the DNA backbone (columns 1-3) and hydrogen bonds with the DNA bases (columns 4-6) with occupancy over 20% are highly dynamic at 363K.

| protein      | DNA backbone | Occupancy (%) | protein      | DNA base | Occupancy (%) |
|--------------|--------------|---------------|--------------|----------|---------------|
| Arg46(C)@NH1 | 2C6@O2P      | 86.00         | Asn45(A)@ND2 | 2G7@O1P  | 46.10         |
| Arg86(C)@NH1 | 1G14@O1P     | 82.10         | Arg46(A)@NH2 | 2G7@O3'  | 26.80         |
| Arg46(A)@NH1 | 2T8@O2P      | 70.60         | Glu80(C)@OE2 | 2C2@N4   | 24.00         |
| Arg42(C)@NH1 | 2G7@O2P      | 68.50         | Arg86(C)@NE  | 1G15@N7  | 23.90         |
| Arg40(A)@NH1 | 1G3@O2P      | 67.30         | Arg86(A)@NH2 | 2C13@O2  | 20.40         |
| Arg10(A)@NH2 | 1G4@O2P      | 56.40         |              |          |               |
| Arg10(A)@NH2 | 1G3@O2P      | 50.00         |              |          |               |
| Arg13(C)@NH2 | 1G15@O2P     | 36.10         |              |          |               |
| Arg40(C)@NH1 | 1G15@O2P     | 36.00         |              |          |               |
| Arg13(C)@NH1 | 2C6@O2P      | 32.20         |              |          |               |
| Arg42(A)@NE  | 1C5@O1P      | 31.20         |              |          |               |
| Arg42(A)@NE  | 2G7@O1P      | 26.80         |              |          |               |
| Arg13(A)@NH1 | 2G9@O1P      | 24.70         |              |          |               |



**Table S8**

Ape10b2 salt bridges with the DNA backbone (columns 1-3) and hydrogen bonds with the DNA bases (columns 4-6) with occupancy over 20% are highly dynamic at 373K.

| protein      | DNA backbone | Occupancy (%) | protein      | DNA base | Occupancy (%) |
|--------------|--------------|---------------|--------------|----------|---------------|
| Arg40(A)@NH1 | 1C5@O1P      | 98.10         | Asn45(C)@ND2 | 1G7@O1P  | 89.40         |
| Arg46(C)@NH1 | 1G7@O1P      | 95.60         | Asn43(C)@ND2 | 2C3@O2   | 81.00         |
| Arg86(A)@NH2 | 1G4@O2P      | 90.60         | Gln82(A)@NE2 | 1G2@N3   | 68.90         |
| Arg42(A)@NE  | 1G7@O1P      | 90.50         | Thr85(C)@OG1 | 1G15@N2  | 62.50         |
| Arg13(C)@NE  | 2G4@O2P      | 82.90         | Arg13(A)@NH2 | 2T8@O5'  | 31.70         |
| Arg86(C)@NH2 | 2C6@O2P      | 76.20         | Arg42(A)@NH2 | 1G7@O5'  | 22.30         |
| Arg87(A)@NE  | 1C6@O1P      | 57.60         | Arg13(C)@NE  | 2G4@O5'  | 20.40         |
| Arg42(C)@NH1 | 2C6@O1P      | 57.40         | Arg10(C)@NE  | 2C3@O5'  | 20.30         |
| Arg13(A)@NE  | 2T8@O1P      | 56.10         |              |          |               |
| Arg42(C)@NH2 | 2G7@O1P      | 48.40         |              |          |               |
| Arg86(C)@NH1 | 2G5@O3'      | 39.80         |              |          |               |
| Arg10(C)@NH1 | 2C3@O2P      | 36.90         |              |          |               |
| Arg13(A)@NH2 | 2G9@O1P      | 36.70         |              |          |               |
| Arg42(C)@NH2 | 2G5@O1P      | 34.50         |              |          |               |
| Arg46(A)@NH1 | 2G7@O2P      | 34.10         |              |          |               |
| Arg42(A)@NE  | 1C6@O3'      | 32.40         |              |          |               |
| Arg86(C)@NH1 | 1G15@O2P     | 29.30         |              |          |               |
| Arg84(C)@NE  | 1G15@O5'     | 23.70         |              |          |               |

**Table S9**

Hydrophobic interactions analyses for Ape10b2-dsDNA complex at 300, 343, 363, and 373K.

| 300K          | 343K          | 363K          | 373K          |
|---------------|---------------|---------------|---------------|
| Val76(A)/2C15 | Gly12(A)/1G3  | Val88(A)/1C5  | Val88(A)/1C6  |
| Ile74(C)/2G4  | Pro15(A)/1G3  | Gly41(A)/1G4  | Ile11(C)/2C3  |
| Pro15(A)/2G7  | Gly41(C)/1G14 | Val88(A)/1G4  | Gly12(C)/2C3  |
| Val76(C)/2C3  | Gly12(C)/1G15 | Val76(C)/1G15 | Val88(A)/1C5  |
| Val76(C)/2G4  | Val16(A)/1G2  | Pro79(C)/2C2  | Pro15(C)/1G7  |
| Val88(C)/2G4  | Pro79(A)/1C6  | Val88(A)/1G3  | Val76(C)/1G15 |
| Ile74(C)/2C3  |               |               | Val76(C)/1G14 |
| Val76(C)/2C2  |               |               | Pro79(C)/1G14 |
| Val16(A)/2C6  |               |               | Gly41(A)/1C6  |
|               |               |               | Gly81(A)/1G2  |
